# Supplementary material for: In Vitro Combinatorial Activity of Direct Acting Antivirals and Monoclonal Antibodies against the Ancestral B.1 and BQ.1.1 SARS-CoV-2 Viral Variants
Source: Preprints.org preprint supplement (doi:10.20944/preprints202401.0279.v1), 2024-01-03

**Supplementary Table 1:** Cytotoxicity and anti-SARS-CoV-2 activity of nirmatrelvir (NRM), EIDD-1931 (the active form of molnupiravir), remdesivir (RDV), sotrovimab (SOT), bebtelovimab (BEB), cilgavimab (CIL) and tixagevimab (TIX) in VERO-E6 cells. The antivirals were tested against the Wild Type B.1 strain and the BQ.1.1 Omicron variant. CC50: half-maximal toxic drug concentration; CC90: drug concentration that causes the death of 90% of cells; IC50: half-maximal inhibitor drug concentration; IC90: drug concentration inhibiting 90% of viral replication; SD: Standard Deviation; NA: Not Active.

|                  | CC <sub>50</sub> $\mu$ M<br>Mean $\pm$ SD | CC <sub>90</sub> $\mu$ M<br>Mean $\pm$ SD | IC <sub>50</sub> $\mu$ M<br>against B.1<br>Mean $\pm$ SD | IC <sub>90</sub> $\mu$ M<br>against B.1<br>Mean $\pm$ SD | IC <sub>50</sub> $\mu$ M<br>against BQ.1.1<br>Mean $\pm$ SD | IC <sub>90</sub> $\mu$ M<br>against BQ.1.1<br>Mean $\pm$ SD |
|------------------|-------------------------------------------|-------------------------------------------|----------------------------------------------------------|----------------------------------------------------------|-------------------------------------------------------------|-------------------------------------------------------------|
| <b>NRM</b>       | 40.7 $\pm$ 4.0                            | 2.9 $\pm$ 0.2                             | 0.1 $\pm$ 0.03                                           | 0.2 $\pm$ 0.1                                            | 0.1 $\pm$ 0.01                                              | 0.2 $\pm$ 0.01                                              |
| <b>EIDD-1931</b> | 43.3 $\pm$ 6.0                            | 3.1 $\pm$ 0.4                             | 2.4 $\pm$ 0.4                                            | 2.5 $\pm$ 0.1                                            | 1.6 $\pm$ 0.4                                               | 1.8 $\pm$ 0.7                                               |
| <b>RDV</b>       | 17.2 $\pm$ 0.2                            | 4.2 $\pm$ 0.6                             | 0.06 $\pm$ 0.03                                          | 0.2 $\pm$ 0.05                                           | 0.03 $\pm$ 0.01                                             | 0.1 $\pm$ 0.01                                              |

|            | CC <sub>50</sub> ng/ml<br>Mean $\pm$ SD | CC <sub>90</sub> ng/ml<br>Mean $\pm$ SD | IC <sub>50</sub> ng/ml<br>against B.1<br>Mean $\pm$ SD | IC <sub>90</sub> ng/ml<br>against B.1<br>Mean $\pm$ SD | IC <sub>50</sub> $\mu$ M<br>against BQ.1.1<br>Mean $\pm$ SD | IC <sub>90</sub> $\mu$ M<br>against BQ.1.1<br>Mean $\pm$ SD |
|------------|-----------------------------------------|-----------------------------------------|--------------------------------------------------------|--------------------------------------------------------|-------------------------------------------------------------|-------------------------------------------------------------|
| <b>SOT</b> | >2400                                   | >2400                                   | 813 $\pm$ 324                                          | 1718 $\pm$ 594                                         | NA                                                          | NA                                                          |
| <b>BEB</b> | >60                                     | >60                                     | 33 $\pm$ 7                                             | 89 $\pm$ 9                                             | NA                                                          | NA                                                          |
| <b>CIL</b> | >360                                    | >360                                    | 204 $\pm$ 1354                                         | 1385 $\pm$ 862                                         | NA                                                          | NA                                                          |
| <b>TIX</b> | >360                                    | >360                                    | 68 $\pm$ 41                                            | 305 $\pm$ 71                                           | NA                                                          | NA                                                          |

**Supplementary Table 2.**  $IC_{50}$  synergistic potency shift was measured in infected VERO E6 cells treated with 3 fixed drug concentrations of Compound 1 plus scalar dilution of Compound 2, for each combination. Fold shift values in Compound 2  $IC_{50}$  were calculated as:  $IC_{50}$  [Compound 2 alone] /  $IC_{50}$  [Compound 1 + Compound 2]. DAA were tested against wild type B.1 SARS-COV-2 strain and BQ.1.1 variant while mAb/RDV combinations only against wild type B.1 SARS-COV-2 strain.

| Against B.1                        |                  |                  |                   |
|------------------------------------|------------------|------------------|-------------------|
| EIDD-1931 $IC_{50}$ Fold Reduction | NRM 0.1 $\mu$ M  | NRM 0.05 $\mu$ M | NRM 0.025 $\mu$ M |
|                                    | 88               | 11               | 1                 |
|                                    | RDV 0.06 $\mu$ M | RDV 0.03 $\mu$ M | RDV 0.015 $\mu$ M |
|                                    | >26              | 26               | 2                 |
| NRM $IC_{50}$ Fold Reduction       | RDV 0.06 $\mu$ M | RDV 0.03 $\mu$ M | RDV 0.015 $\mu$ M |
|                                    | 33               | 8                | 1                 |
| SOT $IC_{50}$ Fold Reduction       | RDV 0.06 $\mu$ M | RDV 0.03 $\mu$ M | RDV 0.015 $\mu$ M |
|                                    | 4                | 2                | 2                 |
| BEB $IC_{50}$ Fold Reduction       | RDV 0.06 $\mu$ M | RDV 0.03 $\mu$ M | RDV 0.015 $\mu$ M |
|                                    | 2                | 1                | 1                 |
| TIX $IC_{50}$ Fold Reduction       | RDV 0.06 $\mu$ M | RDV 0.03 $\mu$ M | RDV 0.015 $\mu$ M |
|                                    | 3                | 2                | 1                 |
| Against BQ.1.1                     |                  |                  |                   |
| EIDD-1931 $IC_{50}$ Fold Reduction | NRM 0.1 $\mu$ M  | NRM 0.05 $\mu$ M | NRM 0.025 $\mu$ M |
|                                    | 28               | 7                | 2                 |
|                                    | RDV 0.06 $\mu$ M | RDV 0.03 $\mu$ M | RDV 0.015 $\mu$ M |
|                                    | >30              | 30               | 3                 |
| NRM $IC_{50}$ Fold Reduction       | RDV 0.06 $\mu$ M | RDV 0.03 $\mu$ M | RDV 0.015 $\mu$ M |
|                                    | 140              | 14               | 2                 |

**Supplementary Figure 1:** Bi-dimensional (2D) synergy plots of antivirals against the two SARS-CoV-2 strains tested, generated by Synergy Finder 3.0 (<https://synergyfinder.fimm.fi/>) applying the ZIP model for each experiment performed. In A were reported the 2D plots of DAAs against the wild type B.1 virus, in supplementary B the 2D plots against the BQ.1.1 variant, and in C the 2D plots of RDV/mAb combinations against the wild type B.1 virus.

**A**

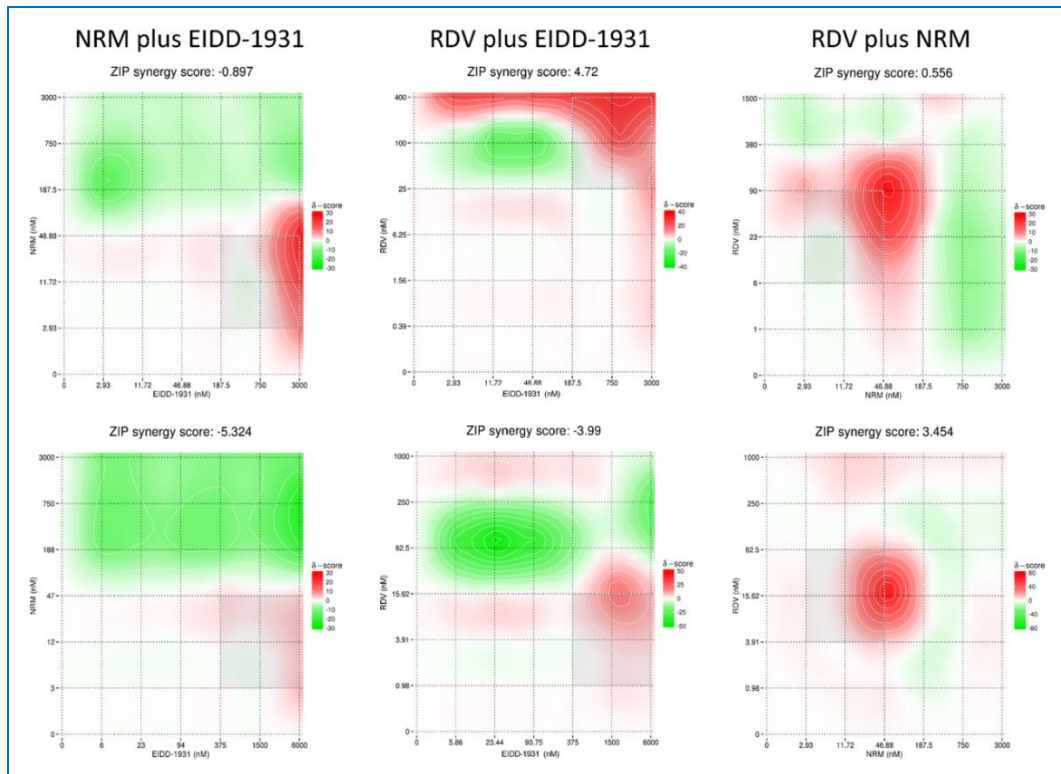

**B**

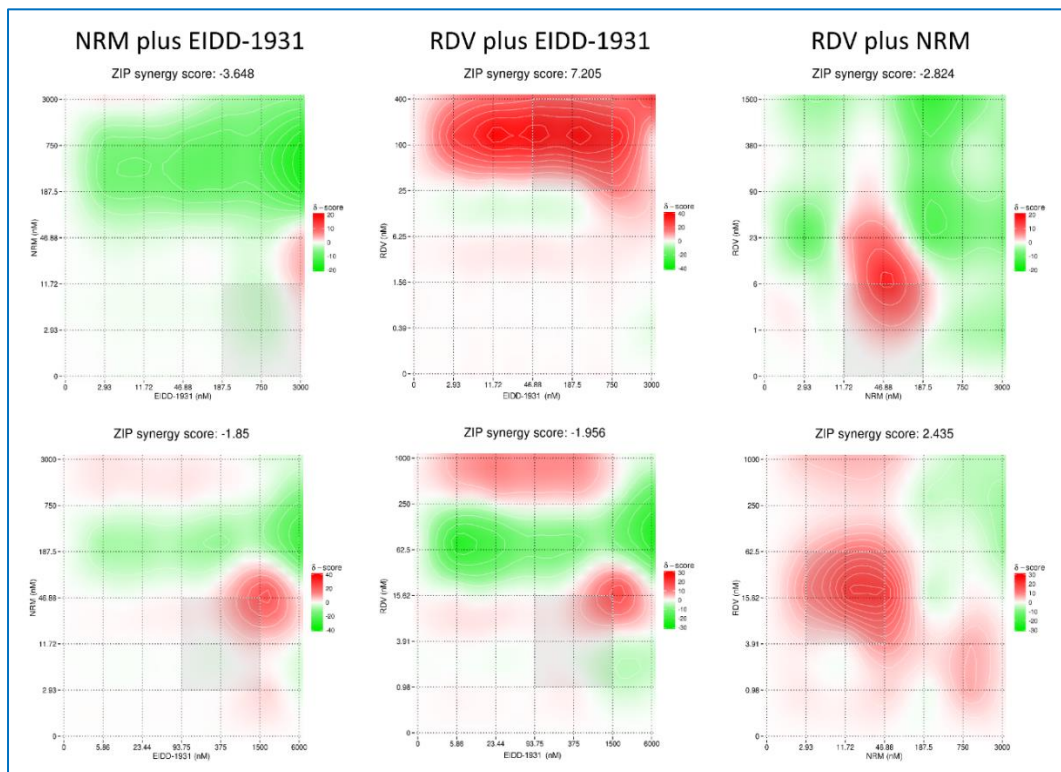

**C**

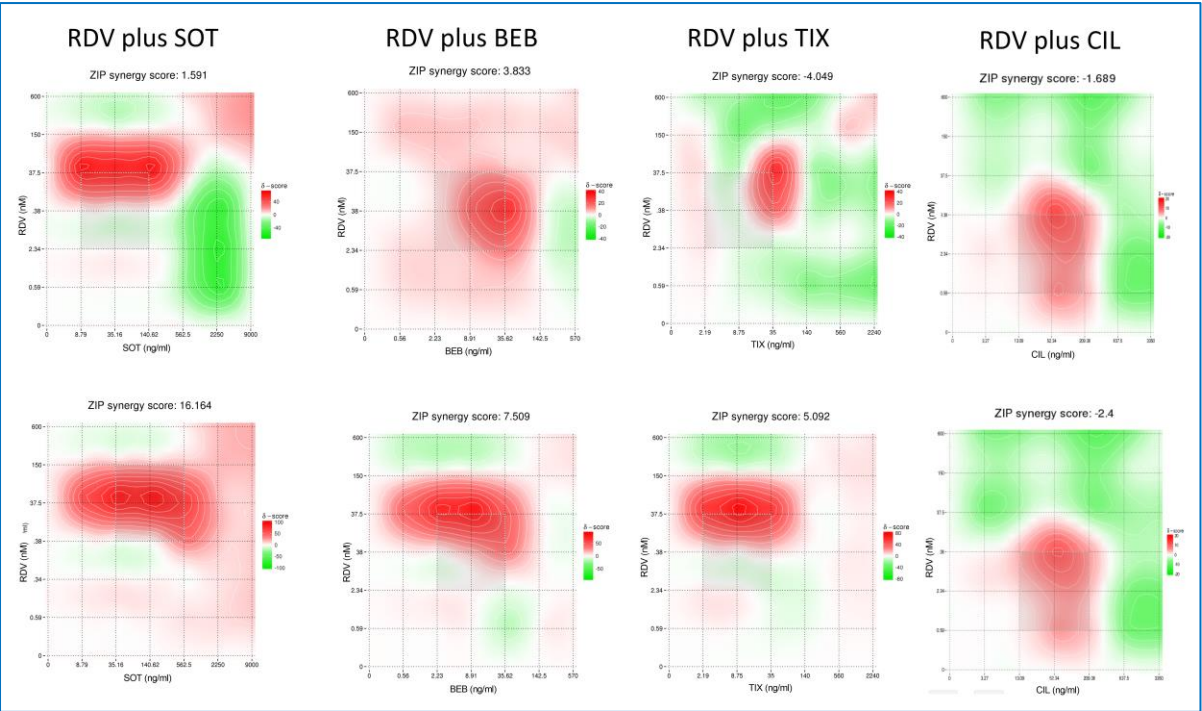

**Supplementary Figure 2:** Overall combinatorial effects of the three DAA pairs as well as those of the three RDV/mAb groups were compared by the Kruskal-Wallis test followed by Mann-Whitney pairwise comparisons between groups. Statistical analysis were performed by SPSS version 20 (SPSS Inc, Chicago, IL USA).

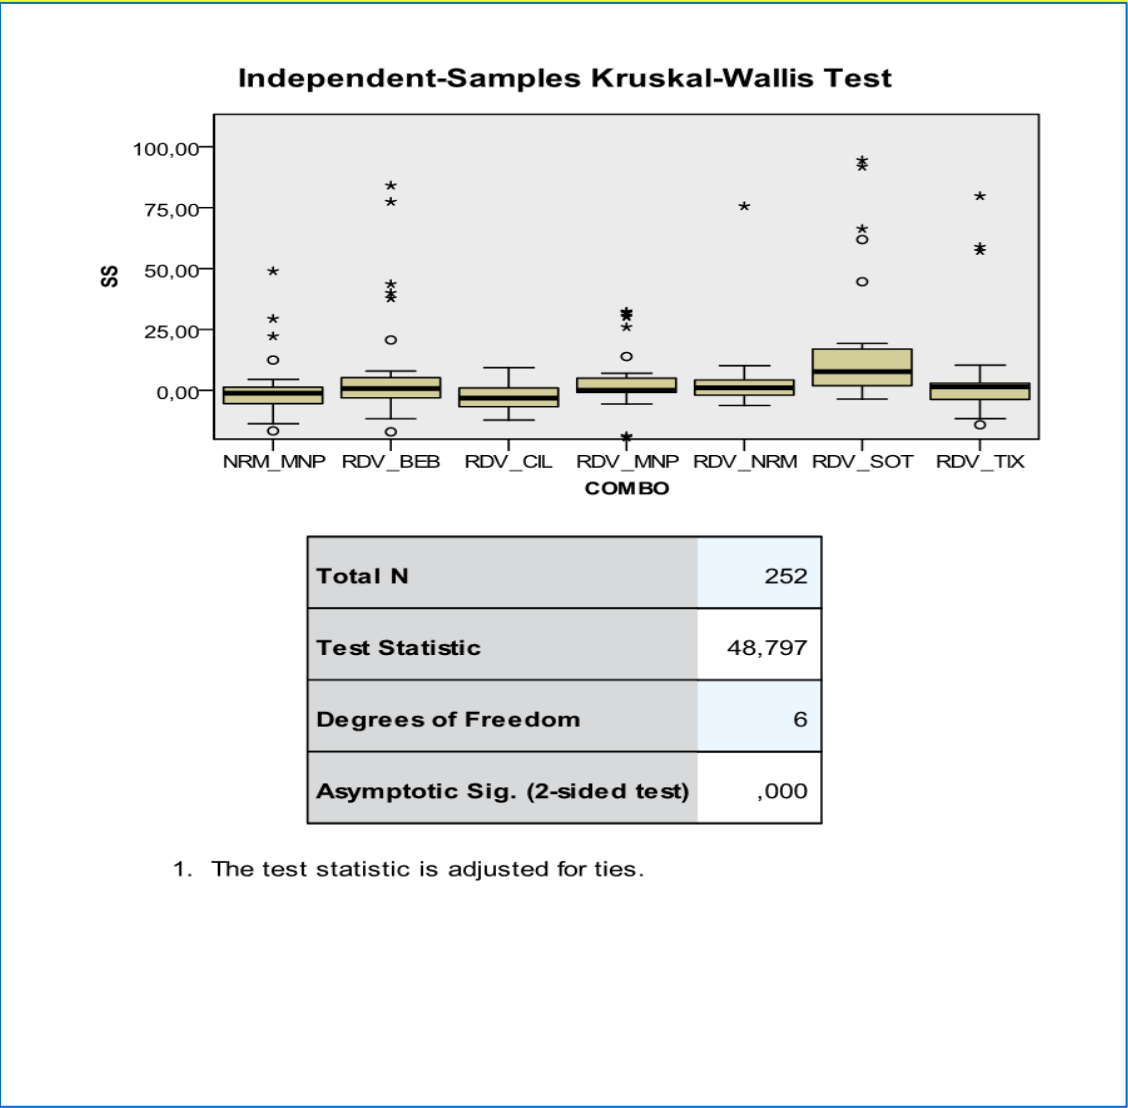

Supplement: Supplementary file 1 [file supplementary]
